# Supplementary material for: Community vibrancy and its relationship with safety in Philadelphia
Source: PLoS One. 2021 Dec 31;16(12):e0257530. doi: 10.1371/journal.pone.0257530 (PMC8719732; doi:10.1371/journal.pone.0257530)
Supplement: S1 File — (ZIP) [file pone.0257530.s001.zip]

Archive with 2 entries (2 files):
- PONE-D-20-26848R2.final.supmaterials.pdf
- PONE-D-20-26848R2.final.supmaterials.tex
